# Supplementary figures and images for: Stream invertebrate communities of Mongolia: current structure and expected changes due to climate change
Source: Springer Nature journal article supplement (doi:10.1186/2046-9063-8-18), 2012-01-01

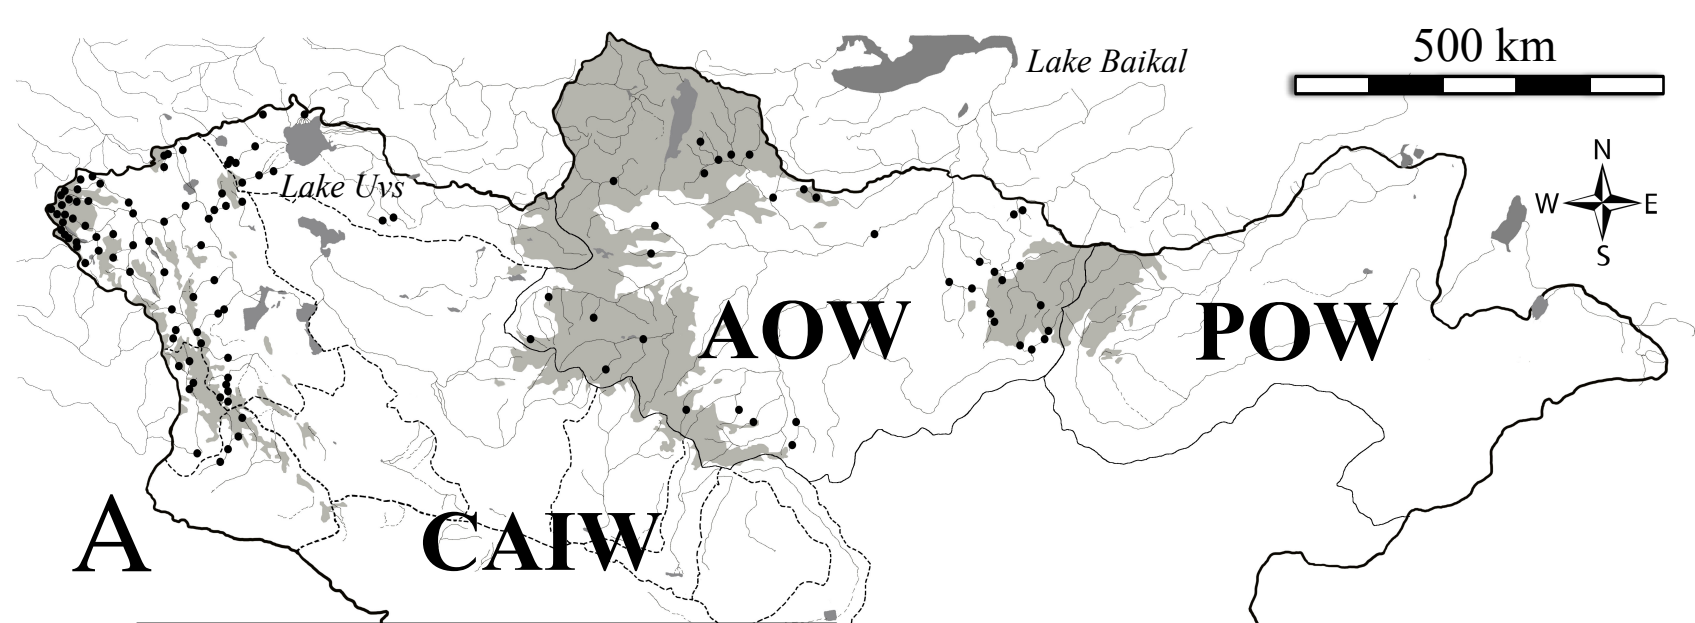

**A**

**CAIW**

**AOW**

**POW**

*Lake Uvs*

*Lake Baikal*

500 km

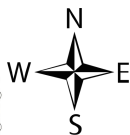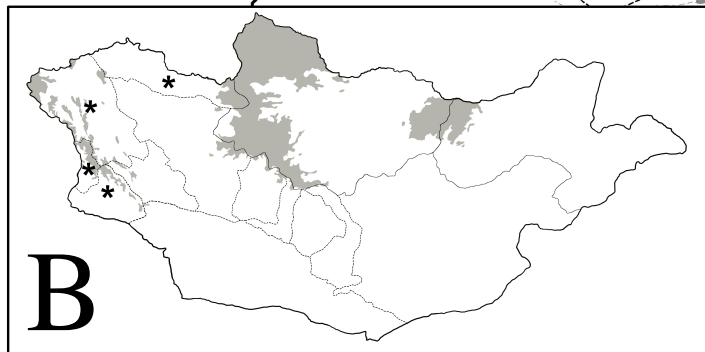

**B**

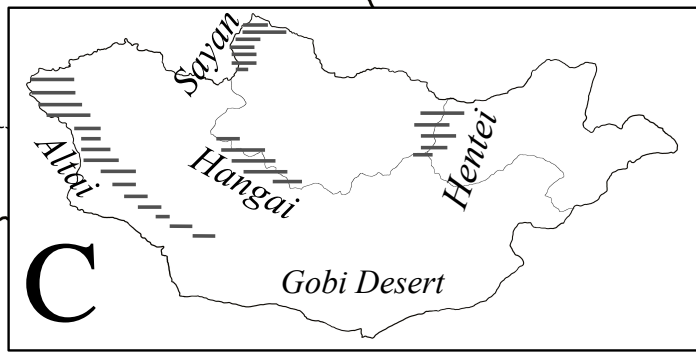

**C**

Supplement: 12999_2012_20_MOESM1_ESM.pdf [file 12999_2012_20_MOESM1_ESM.pdf]

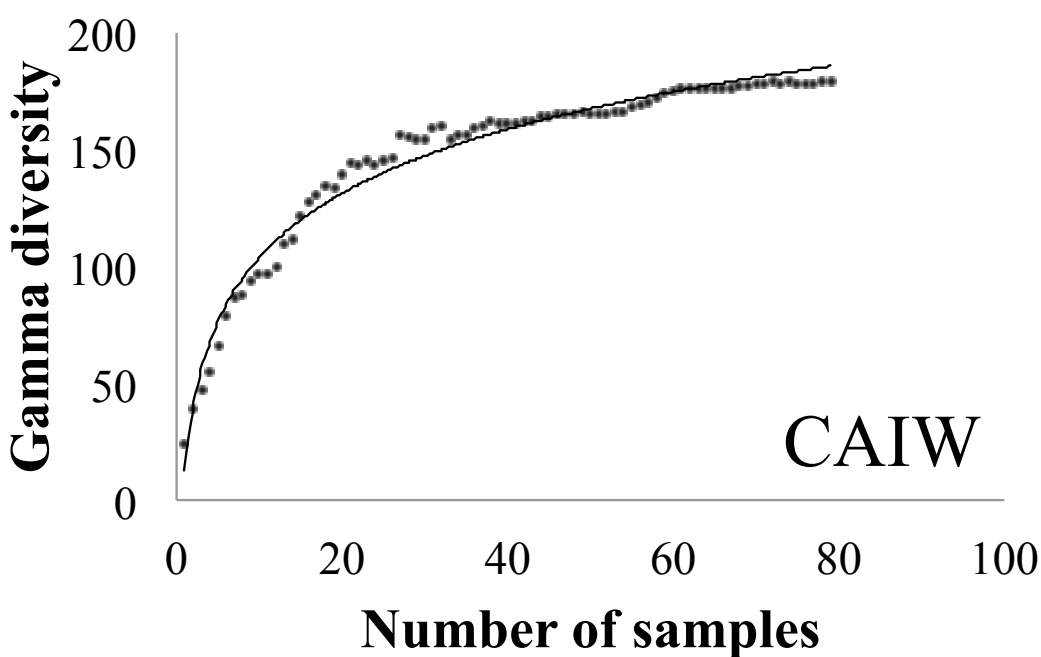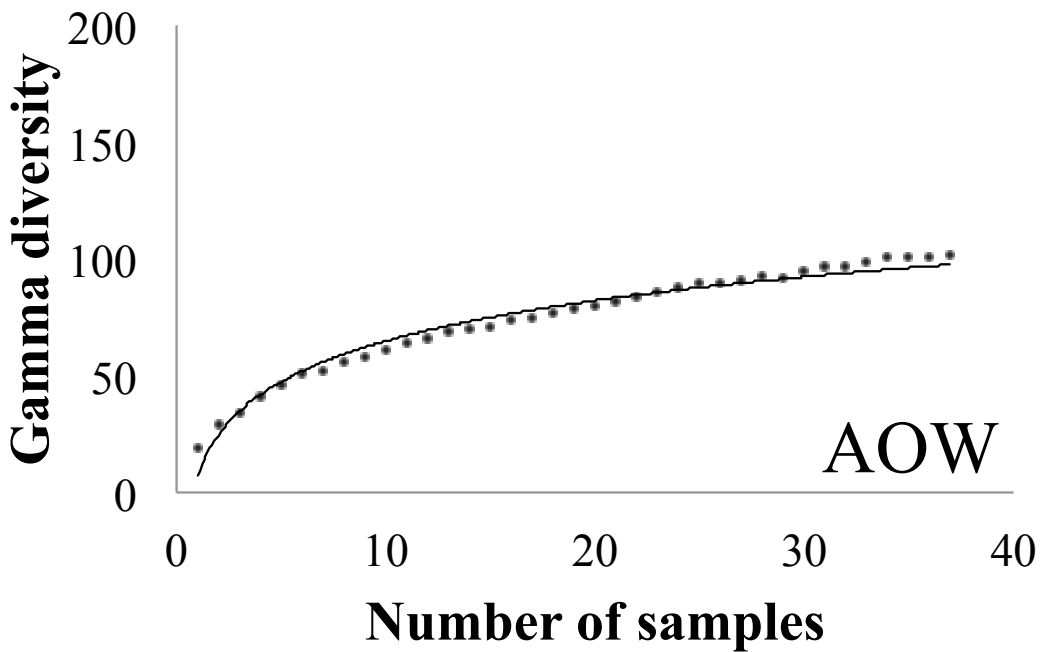

Supplement: 12999_2012_20_MOESM2_ESM.pdf [file 12999_2012_20_MOESM2_ESM.pdf]

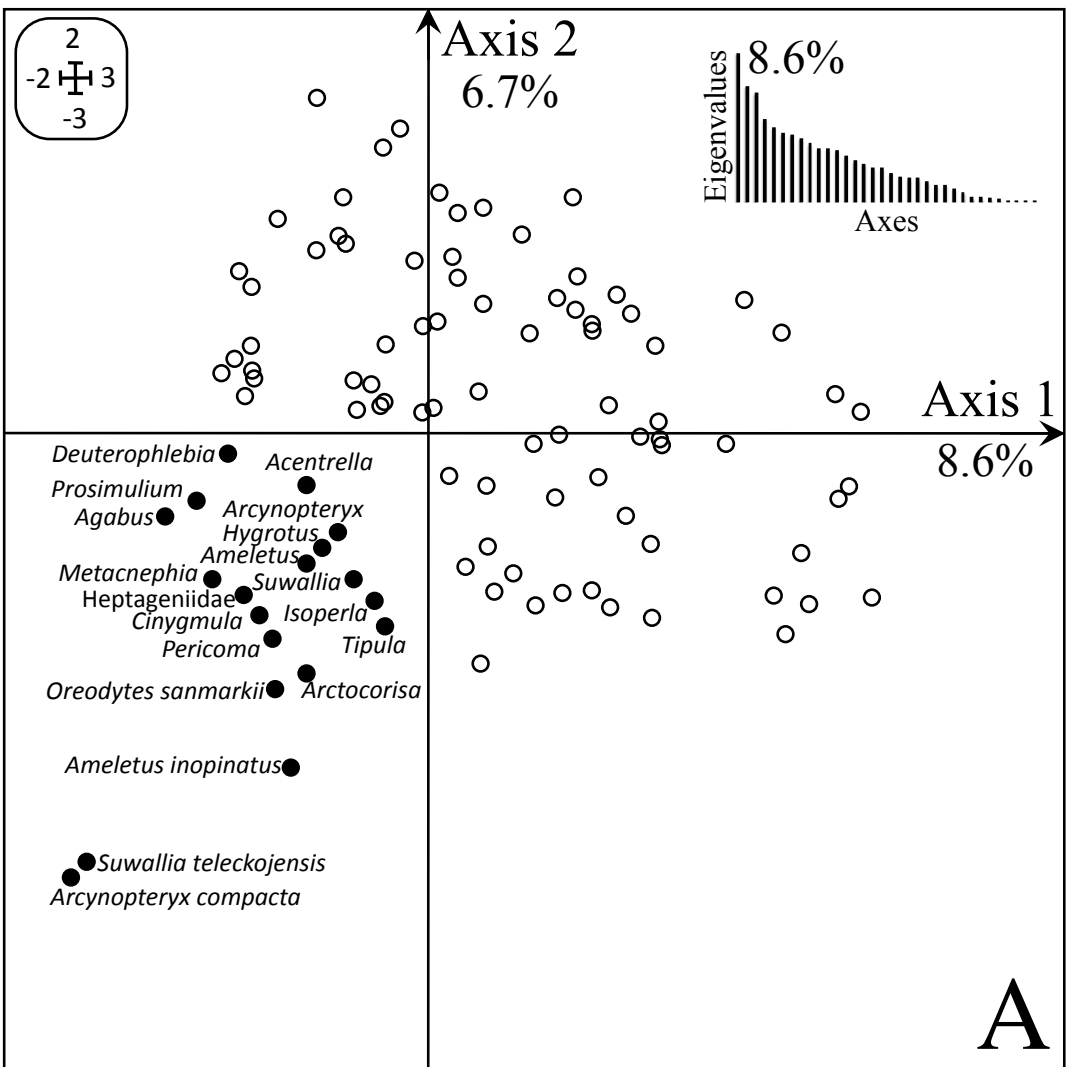

A

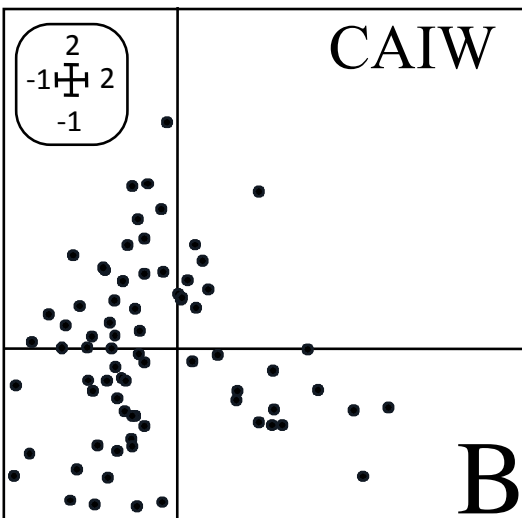

B

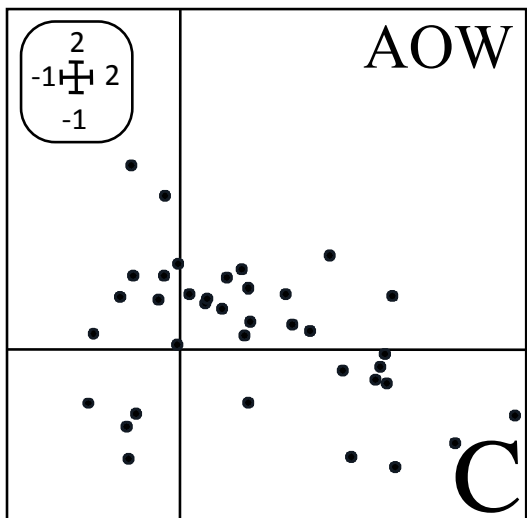

C

Supplement: 12999_2012_20_MOESM3_ESM.pdf [file 12999_2012_20_MOESM3_ESM.pdf]

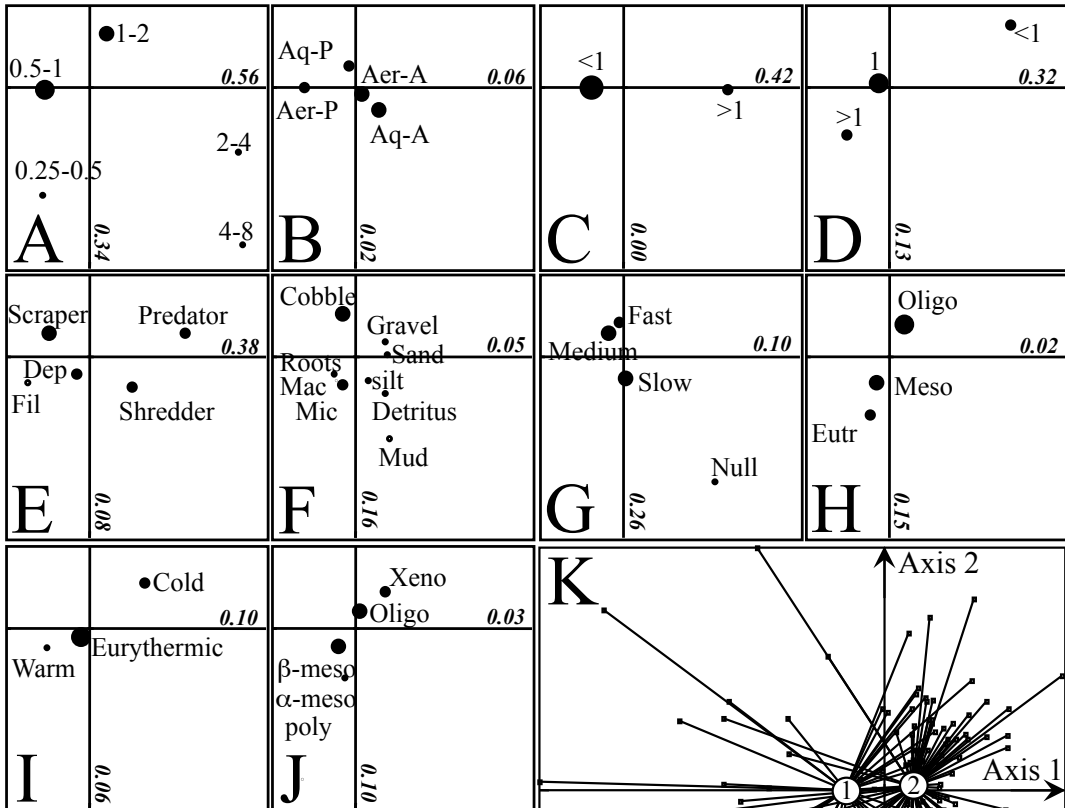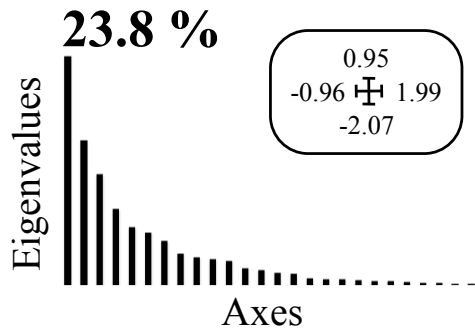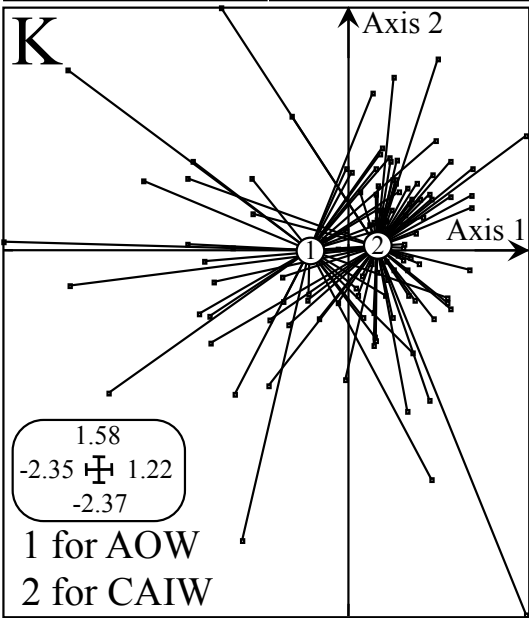

Supplement: 12999_2012_20_MOESM4_ESM.pdf [file 12999_2012_20_MOESM4_ESM.pdf]
